# Supplementary material
Source: Springer Nature journal article supplement (https://www.springermedizin.de/resource/supplementary/13017_2008_116_MOESM1_ESM.pdf/9635592)
Supplement: MOESM1 [file 9635592]

**A T L S A l g o r i t h m**

|          |                                                         |
|----------|---------------------------------------------------------|
| <b>A</b> | <b>Airway Maintenance and Cervical Spine Protection</b> |
| <b>B</b> | <b>Breathing and ventilation</b>                        |
| <b>C</b> | <b>Circulation and hemorrhage control</b>               |
| <b>D</b> | <b>Disability</b>                                       |
| <b>E</b> | <b>Exposure</b>                                         |

**T I M E**

| <b>ASSESSMENT</b>                                                                       |
|-----------------------------------------------------------------------------------------|
| Unconscious                                                                             |
| Chest injuries ?<br>- Ribcage<br>- Bruising                                             |
| Abdominal injury ?<br>- Retroperitoneum<br>- Pelvis                                     |
| Normal mot./sen. Exam<br>Normal Reflexes<br>Normal Sphincter tone                       |
| Abnorm. mot./sen. Exam<br>Abnorm. Reflexes<br>Abnorm. Sphincter tone                    |
| <u>Log-Roll &amp; Spine exam</u><br>Posterior Processus ?<br>Tenderness ?<br>Bruising ? |

**S P I N E T R A U M A**

**Only Withdraw spinal precautions in the alert and conscious patient**
